# Supplementary material for: Dynamique des choix : modèles et applications
Source: MDPI journal article supplement (doi:10.3390/jcm13082164), 2003-01-01
Supplement: s1 [file s1]

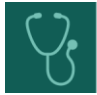

## Supplementary Materials

**Table S1.** Participants baseline characteristics by estimated glomerular filtration rate group.

| Variables                       | eGFR                          |                                 |                               | p-value |
|---------------------------------|-------------------------------|---------------------------------|-------------------------------|---------|
|                                 | <60 ml/min/1.73m <sup>2</sup> | 60–89 ml/min/1.73m <sup>2</sup> | ≥90 ml/min/1.73m <sup>2</sup> |         |
| Total (n)                       | 25,584                        | 80,377                          | 42,128                        |         |
| CKD (n)                         | 2128 (8.3%)                   | 2000 (2.5%)                     | 602 (1.4%)                    | <0.001  |
| Sex                             |                               |                                 |                               | <0.001  |
| Women                           | 16,265 (63.6%)                | 40,970 (51.0%)                  | 16,204 (38.4%)                |         |
| Men                             | 9,319 (36.4%)                 | 39,407 (49.0%)                  | 25,924 (61.5%)                |         |
| Age, group (years)              |                               |                                 |                               | <0.001  |
| 40–44                           | 779 (3.0%)                    | 14,140 (17.6%)                  | 15,384 (36.5%)                |         |
| 45–54                           | 3408 (13.3%)                  | 32,012 (39.8%)                  | 19,215 (45.6%)                |         |
| 55–64                           | 6,208 (24.3%)                 | 22,467 (28.0%)                  | 6,102 (14.5%)                 |         |
| 65–74                           | 10,283 (40.2%)                | 10,695 (13.3%)                  | 1354 (3.2%)                   |         |
| ≥75                             | 4906 (19.2%)                  | 1,063 (1.3%)                    | 73 (0.2%)                     |         |
| BMI, group (kg/m <sup>2</sup> ) |                               |                                 |                               | <0.001  |
| <18.5                           | 2040 (8.0%)                   | 1572 (2.0%)                     | 176 (0.4%)                    |         |
| 18.5–23                         | 13,286 (51.9%)                | 32,799 (40.8%)                  | 8646 (20.5%)                  |         |
| 23–25                           | 5720 (22.4%)                  | 23,134 (28.8%)                  | 11,025 (26.2%)                |         |
| 25–30                           | 4311 (16.9%)                  | 21,479 (26.7%)                  | 19,347 (45.9%)                |         |
| ≥30                             | 220 (0.9%)                    | 1366 (1.7%)                     | 2920 (6.9%)                   |         |
| Income, group                   |                               |                                 |                               | <0.001  |
| Low                             | 6372 (25.1%)                  | 19,833 (25.0%)                  | 8961 (21.5%)                  |         |
| Middle                          | 8157 (32.2%)                  | 27,375 (34.4%)                  | 14,455 (34.7%)                |         |
| High                            | 10,822 (42.7%)                | 32,266 (40.6%)                  | 18,186 (43.7%)                |         |
| Smoking, group                  |                               |                                 |                               | <0.001  |
| Nonsmoker                       | 19,091 (75.1%)                | 51,747 (64.8%)                  | 22,267 (53.1%)                |         |
| Ex-smoker                       | ,956 (11.6%)                  | 12,327 (15.4%)                  | 7954 (19.0%)                  |         |
| Current smoker                  | 3381 (13.3%)                  | 15,767 (19.7%)                  | 11,689 (27.9%)                |         |
| DM                              | 5763 (22.5%)                  | 10,662 (13.3%)                  | 4579 (10.9%)                  | <0.001  |
| HTN                             | 13,108 (51.2%)                | 24,410 (30.4%)                  | 10,493 (24.9%)                | <0.001  |
| Dyslipidemia                    | 8178 (32.0%)                  | 19,040 (23.7%)                  | 9128 (21.7%)                  | <0.001  |
| Stroke                          | 1175 (4.6%)                   | 1516 (1.9%)                     | 472 (1.1%)                    | <0.001  |
| MI                              | 396 (1.6%)                    | 461 (0.6%)                      | 173 (0.4%)                    | <0.001  |
| HF                              | 431 (1.7%)                    | 408 (0.5%)                      | 131 (0.3%)                    | <0.001  |
| A. fib                          | 830 (3.2%)                    | 1159 (1.4%)                     | 480 (1.1%)                    | <0.001  |
| Death (n)                       | 6014 (23.5%)                  | 5122 (6.4%)                     | 1524 (3.6%)                   | <0.001  |
| Creatinine (mg/dL)              | 1.2 ± 1.3                     | 1.1 ± 1.3                       | 1.0 ± 1.2                     | <0.001  |
| SBP (mmHg)                      | 126.5 ± 16.8                  | 123.4 ± 15.4                    | 124.5 ± 14.7                  | <0.001  |
| DBP (mmHg)                      | 77.0 ± 10.3                   | 76.8 ± 10.1                     | 78.1 ± 10.3                   | <0.001  |

Data have been expressed as mean ± standard deviation or number. Abbreviations: CKD, chronic kidney disease; eGFR, estimated glomerular filtration rate; BMI, body mass index; DM, diabetes mellitus; HTN, Hypertension; Stroke, ischemic stroke history; MI, myocardial infarction history; HF, heart failure; A.fib, atrial fibrillation and flutter; SBP, systolic blood pressure; DBP, diastolic blood pressure.

**Table S2.** Participants baseline characteristics by Sex.

| Variables | Men (%) | Women (%) | p-value |
|-----------|---------|-----------|---------|
| Total (n) | 74,650  | 73,439    |         |

|                                 |                |                |        |
|---------------------------------|----------------|----------------|--------|
| CKD (n)                         | 2856 (3.8%)    | 1874 (2.6%)    | <0.001 |
| Age, group (years)              |                |                | <0.001 |
| 40-44                           | 16,181 (21.7%) | 14,122 (19.2%) |        |
| 45-54                           | 28,043 (37.6%) | 26,592 (36.2%) |        |
| 55-64                           | 17,364 (23.3%) | 17,413 (23.7%) |        |
| 65-74                           | 10,525 (14.1%) | 11,807 (16.1%) |        |
| ≥75                             | 2537 (3.4%)    | 3505 (4.8%)    |        |
| BMI, group (kg/m <sup>2</sup> ) |                |                | <0.001 |
| <18.5                           | 1791 (2.4%)    | 1997 (2.7%)    |        |
| 18.5-23                         | 24,635 (33.0%) | 30,096 (41.0%) |        |
| 23-25                           | 21,518 (28.8%) | 18,361 (25.0%) |        |
| 25-30                           | 24,772 (33.2%) | 20,365 (27.7%) |        |
| ≥30                             | 1902 (2.5%)    | 2604 (3.5%)    |        |
| Income, group                   |                |                | <0.001 |
| Low                             | 14,117 (18.9%) | 21,049 (28.7%) |        |
| Middle                          | 25,418 (34.0%) | 24,569 (33.5%) |        |
| High                            | 34,070 (45.6%) | 27,204 (37.0%) |        |
| Smoking, group                  |                |                | <0.001 |
| Non-smoker                      | 23318          | 69,787         |        |
| Ex-smoker                       | 22187          | 1050           |        |
| Current-smoker                  | 28737          | 2100           |        |
| DM                              | 10,406 (13.9%) | 10,598 (14.4%) | 0.006  |
| HTN                             | 23,604 (31.6%) | 24,407 (33.2%) | <0.001 |
| Dyslipidemia                    | 17,464 (23.4%) | 18,882 (25.7%) | <0.001 |
| Stroke                          | 1453 (1.9%)    | 1710 (2.3%)    | <0.001 |
| MI                              | 613 (0.8%)     | 417 (0.6%)     | <0.001 |
| HF                              | 346 (0.5%)     | 624 (0.8%)     | <0.001 |
| A. fib                          | 1312 (1.8%)    | 1157 (1.6%)    | <0.001 |

Abbreviations: CKD, chronic kidney disease; BMI, body mass index; DM, diabetes mellitus; HTN, Hypertension; Stroke, ischemic stroke history; MI, myocardial infarction history; HF, heart failure; A.fib, atrial fibrillation and flutter.

**Table S3.** Smoking status according to Sex and eGFR.

| Variables      | eGFR           |                               |                                 |                               | p-value |
|----------------|----------------|-------------------------------|---------------------------------|-------------------------------|---------|
|                | Total          | <60 ml/min/1.73m <sup>2</sup> | 60–89 ml/min/1.73m <sup>2</sup> | ≥90 ml/min/1.73m <sup>2</sup> |         |
| Nonsmoker      | 93,105         |                               |                                 |                               | <0.001  |
| Women          | 69,787 (74.6%) | 15,411 (16.6%)                | 39,043 (41.9%)                  | 15,333 (16.5%)                |         |
| Men            | 23,318 (33.4%) | 3680 (4%)                     | 12,704 (13.6%)                  | 6934 (7.4%)                   |         |
| Exsmoker       | 23,237         |                               |                                 |                               | <0.001  |
| Women          | 1050 (4.5%)    | 225 (1%)                      | 561 (2.4%)                      | 264 (1.1%)                    |         |
| Men            | 22,187 (95.5%) | 2731 (11.8%)                  | 11,766 (50.6%)                  | 7690 (33.1%)                  |         |
| Current smoker | 30,837         |                               |                                 |                               | <0.001  |
| Women          | 2100 (6.8%)    | 521 (1.7%)                    | 1066 (3.5%)                     | 513 (1.7%)                    |         |
| Men            | 28,737 (93.2%) | 2860 (9.3%)                   | 14,701 (47.7%)                  | 11,176 (36.2%)                |         |

Abbreviations: eGFR, estimated glomerular filtration rate.
